# Supplementary material for: Mutant LRRK2 mediates peripheral and central immune responses leading to neurodegeneration in vivo
Source: Oxford University Press journal article supplement (doi:10.1093/brain/awy077), 2018-03-04
Supplement: awy077_suppl_data.zip [file awy077_suppl_data.zip]

Archive with 7 entries (7 files):
- brain-2017-01999-File008.pdf
- brain-2017-01999-File009.pdf
- brain-2017-01999-File010.pdf
- brain-2017-01999-File011.pdf
- brain-2017-01999-File012.pdf
- brain-2017-01999-File013.pdf
- brain-2017-01999-File014.pdf
