# Supplementary material for: Mutant LRRK2 mediates peripheral and central immune responses leading to neurodegeneration in vivo
Source: Oxford University Press journal article supplement (doi:10.1093/brain/awy077), 2018-03-04
Supplement: awy077_suppl_data.zip [file awy077_suppl_data.zip › brain-2017-01999-File014.pdf]

| Gene name  | Protein description                                                                              | Log2(FC) | P value   | FDR       |
|------------|--------------------------------------------------------------------------------------------------|----------|-----------|-----------|
| Hapln2     | Hyaluronan and proteoglycan link protein 2 OS=Mus musculus GN=Hapln2 PE=1 SV=1                   | 0.873808 | 0.0007148 | 0.1490124 |
| Tgtp1      | Interferon-gamma-inducible GTPase Ifggb5 protein OS=Mus musculus GN=Ifggb5 PE=2 SV=1             | 0.771847 | 0.0054475 | 0.1706080 |
| Il33       | Interleukin-33 OS=Mus musculus GN=Il33 PE=1 SV=1                                                 | 0.736856 | 0.0005389 | 0.1490124 |
| B9d2       | B9 domain-containing protein 2 OS=Mus musculus GN=B9d2 PE=1 SV=2                                 | 0.690518 | 2.23E-05  | 0.1417217 |
| Fbxl13     | F-box/LRR-repeat protein 13 OS=Mus musculus GN=Fbxl13 PE=2 SV=2                                  | 0.587091 | 0.0012141 | 0.1490124 |
| Ifit3      | Interferon-induced protein with tetratricopeptide repeats 3 OS=Mus musculus GN=Ifit3 PE=2 SV=1   | 0.579530 | 0.0022099 | 0.1490124 |
| Homez      | Homeobox and leucine zipper protein Homez OS=Mus musculus GN=Homez PE=2 SV=2                     | 0.539111 | 0.0014351 | 0.1490124 |
| Ifit1      | Interferon-induced protein with tetratricopeptide repeats 1 OS=Mus musculus GN=Ifit1 PE=1 SV=2   | 0.490342 | 0.0006714 | 0.1490124 |
| Ifit2      | Interferon-induced protein with tetratricopeptide repeats 2 OS=Mus musculus GN=Ifit2 PE=1 SV=1   | 0.489249 | 0.0072218 | 0.1750796 |
| Tmed1      | Transmembrane emp24 domain-containing protein 1 OS=Mus musculus GN=Tmed1 PE=2 SV=1               | 0.487081 | 0.0002368 | 0.1417217 |
| Cox14      | Cytochrome c oxidase assembly protein COX14 OS=Mus musculus GN=Cox14 PE=2 SV=1                   | 0.479226 | 0.0064150 | 0.1729044 |
| Parp12     | Poly [ADP-ribose] polymerase 12 OS=Mus musculus GN=Parp12 PE=2 SV=3                              | 0.464842 | 0.0009674 | 0.1490124 |
| Atp5g1     | ATP synthase F(0) complex subunit C1, mitochondrial OS=Mus musculus GN=Atp5g1 PE=2 SV=1          | 0.453688 | 0.0007200 | 0.1490124 |
| Plin4      | Perilipin-4 OS=Mus musculus GN=Plin4 PE=1 SV=2                                                   | 0.450555 | 0.0007155 | 0.1490124 |
| Dennd3     | DENN domain-containing protein 3 OS=Mus musculus GN=Dennd3 PE=2 SV=2                             | 0.448641 | 0.0043463 | 0.1667068 |
| Smug1      | Single-strand selective monofunctional uracil DNA glycosylase OS=Mus musculus GN=Smug1 PE=2 SV=1 | 0.429318 | 0.0015533 | 0.1490124 |
| Khk        | Ketohexokinase OS=Mus musculus GN=Khk PE=1 SV=1                                                  | 0.428903 | 0.0002481 | 0.1417217 |
| Fam84b     | Protein Fam84b OS=Mus musculus GN=Fam84b PE=4 SV=1                                               | 0.427530 | 8.55E-05  | 0.1417217 |
| BC026585   | Quinone oxidoreductase-like protein 2 OS=Mus musculus PE=1 SV=1                                  | 0.424268 | 0.0024303 | 0.1490124 |
| Csgalnact2 | Chondroitin sulfate N-acetylgalactosaminyltransferase 2 OS=Mus musculus GN=Csgalnact2 PE=2 SV=1  | 0.416486 | 0.0036202 | 0.1640849 |
| Ucp2       | Mitochondrial uncoupling protein 2 OS=Mus musculus GN=Ucp2 PE=1 SV=1                             | 0.408567 | 0.0007179 | 0.1490124 |
| Sp110      | Sp110 nuclear body protein OS=Mus musculus GN=Sp110 PE=1 SV=1                                    | 0.402247 | 0.0002274 | 0.1417217 |
| Pcyox11    | Prenylcysteine oxidase-like OS=Mus musculus GN=Pcyox11 PE=2 SV=1                                 | 0.374256 | 0.0025472 | 0.1490124 |
| Xdh        | Xanthine dehydrogenase/oxidase OS=Mus musculus GN=Xdh PE=1 SV=5                                  | 0.373220 | 0.0045563 | 0.1667068 |
| Lman2l     | VIP36-like protein OS=Mus musculus GN=Lman2l                                                     | 0.364311 | 0.0010194 | 0.1490124 |

|        |                                                                                                      |          |           |           |
|--------|------------------------------------------------------------------------------------------------------|----------|-----------|-----------|
|        | PE=2 SV=1                                                                                            |          |           |           |
| Hrsp12 | Ribonuclease UK114 OS=Mus musculus GN=Hrsp12<br>PE=1 SV=3                                            | 0.364189 | 0.0014737 | 0.1490124 |
| Dynll1 | Dynein light chain 1, cytoplasmic OS=Mus musculus<br>GN=Dynll1 PE=1 SV=1                             | 0.363043 | 0.0005255 | 0.1490124 |
| Fosl2  | Fos-related antigen 2 OS=Mus musculus GN=Fosl2<br>PE=1 SV=2                                          | 0.361418 | 0.0026087 | 0.1490124 |
| Inmt   | Indolethylamine N-methyltransferase OS=Mus<br>musculus GN=Inmt PE=1 SV=1                             | 0.360707 | 0.0008185 | 0.1490124 |
| Mterf  | Transcription termination factor 1a, mitochondrial<br>OS=Mus musculus GN=Mterf1a PE=2 SV=1           | 0.358041 | 0.0102253 | 0.1908301 |
| Suds3  | Sin3 histone deacetylase corepressor complex<br>component SDS3 OS=Mus musculus GN=Suds3<br>PE=1 SV=1 | 0.354419 | 0.0013787 | 0.1490124 |
| Ass1   | Argininosuccinate synthase OS=Mus musculus<br>GN=Ass1 PE=1 SV=1                                      | 0.349162 | 0.0022806 | 0.1490124 |
| Car7   | Carbonic anhydrase 7 OS=Mus musculus GN=Car7<br>PE=4 SV=1                                            | 0.348563 | 0.0034637 | 0.1610619 |
| Bex2   | Protein BEX2 OS=Mus musculus GN=Bex2 PE=1<br>SV=1                                                    | 0.348510 | 0.0027094 | 0.1490124 |
| Krt76  | Keratin, type II cytoskeletal 2 oral OS=Mus musculus<br>GN=Krt76 PE=2 SV=1                           | 0.344177 | 0.0002077 | 0.1417217 |
| Dpep1  | Dipeptidase 1 OS=Mus musculus GN=Dpep1 PE=1<br>SV=2                                                  | 0.340169 | 0.0006495 | 0.1490124 |
| Bex1   | Protein BEX1 OS=Mus musculus GN=Bex1 PE=1<br>SV=2                                                    | 0.339395 | 0.0057543 | 0.1716923 |
| Clic6  | Chloride intracellular channel protein 6 OS=Mus<br>musculus GN=Clic6 PE=2 SV=1                       | 0.337351 | 0.001236  | 0.1490124 |
| Parp10 | Plec1 protein OS=Mus musculus GN=Parp10 PE=2<br>SV=1                                                 | 0.335064 | 0.0008349 | 0.1490124 |
| ATP6   | ATP synthase subunit a OS=Mus musculus GN=mt-<br>Atp6 PE=4 SV=1                                      | 0.333825 | 0.0017510 | 0.1490124 |
| Mysm1  | Histone H2A deubiquitinase MYSM1 OS=Mus<br>musculus GN=Mysm1 PE=2 SV=2                               | 0.331818 | 0.0024471 | 0.1490124 |
| Icosl  | ICOS ligand OS=Mus musculus GN=Icoslg PE=1<br>SV=1                                                   | 0.326045 | 0.0004038 | 0.1490124 |
| Porcn  | Protein-cysteine N-palmitoyltransferase porcupine<br>OS=Mus musculus GN=Porcn PE=1 SV=1              | 0.324624 | 0.0002142 | 0.1417217 |
| Naaa   | N-acylethanolamine-hydrolyzing acid amidase<br>OS=Mus musculus GN=Naaa PE=2 SV=2                     | 0.322978 | 0.0002870 | 0.1417217 |
| Cnn1   | Calponin-1 OS=Mus musculus GN=Cnn1 PE=2 SV=1                                                         | 0.321488 | 0.0002157 | 0.1417217 |
| Cd82   | CD82 antigen OS=Mus musculus GN=Cd82 PE=1<br>SV=1                                                    | 0.320772 | 0.0004486 | 0.1490124 |
| Ctss   | Cathepsin S OS=Mus musculus GN=Ctss PE=1 SV=2                                                        | 0.320172 | 0.0024211 | 0.1490124 |
| Capsl  | Calcyphosin-like protein OS=Mus musculus<br>GN=Capsl PE=2 SV=4                                       | 0.318512 | 0.0002684 | 0.1417217 |
| Ifi47  | GTP-binding protein OS=Mus musculus GN=Ifi47<br>PE=2 SV=1                                            | 0.318369 | 0.0070422 | 0.1730496 |
| Mchr1  | Melanin-concentrating hormone receptor 1 OS=Mus<br>musculus GN=Mchr1 PE=2 SV=2                       | 0.318027 | 0.0031952 | 0.1550187 |

|          |                                                                                                   |          |           |           |
|----------|---------------------------------------------------------------------------------------------------|----------|-----------|-----------|
| Acan     | Aggrecan core protein OS=Mus musculus GN=Acan<br>PE=1 SV=2                                        | 0.317981 | 0.0031173 | 0.1547444 |
| C1qtnf5  | Complement C1q tumor necrosis factor-related<br>protein 5 OS=Mus musculus GN=C1qtnf5 PE=1<br>SV=1 | 0.316813 | 0.0070028 | 0.1730496 |
| Haus1    | HAUS augmin-like complex subunit 1 OS=Mus<br>musculus GN=Haus1 PE=2 SV=2                          | 0.316010 | 0.0018314 | 0.1490124 |
| Tpm2     | Tropomyosin beta chain OS=Mus musculus<br>GN=Tpm2 PE=1 SV=1                                       | 0.314836 | 0.0067568 | 0.1730496 |
| Ddx21    | Nucleolar RNA helicase 2 OS=Mus musculus<br>GN=Ddx21 PE=1 SV=3                                    | 0.314622 | 0.0088524 | 0.1835521 |
| Clic1    | Chloride intracellular channel protein 1 OS=Mus<br>musculus GN=Clic1 PE=1 SV=3                    | 0.314367 | 0.0013207 | 0.1490124 |
| Cryab    | Alpha-crystallin B chain OS=Mus musculus<br>GN=Cryab PE=1 SV=2                                    | 0.314097 | 0.0015712 | 0.1490124 |
| Rnf167   | E3 ubiquitin-protein ligase RNF167 OS=Mus<br>musculus GN=Rnf167 PE=2 SV=1                         | 0.313145 | 0.0028383 | 0.1504503 |
| Psmb8    | Proteasome subunit beta type-8 OS=Mus musculus<br>GN=Psmb8 PE=1 SV=2                              | 0.311759 | 0.0011020 | 0.1490124 |
| Slc28a3  | Solute carrier family 28 member 3 OS=Mus musculus<br>GN=Slc28a3 PE=2 SV=1                         | 0.309261 | 0.0002489 | 0.1417217 |
| Upp1     | Uridine phosphorylase 1 OS=Mus musculus<br>GN=Upp1 PE=1 SV=2                                      | 0.309229 | 0.0016352 | 0.1490124 |
| Lgals3bp | Galectin-3-binding protein OS=Mus musculus<br>GN=Lgals3bp PE=1 SV=1                               | 0.305508 | 0.0064986 | 0.1730496 |
| Hvcn1    | Voltage-gated hydrogen channel 1 OS=Mus musculus<br>GN=Hvcn1 PE=1 SV=2                            | 0.304577 | 0.0074938 | 0.1752156 |
| Myh4     | Myosin-4 OS=Mus musculus GN=Myh4 PE=1 SV=1                                                        | 0.300790 | 0.0024922 | 0.1490124 |
| Abhd14b  | Alpha/beta hydrolase domain-containing protein 14B<br>OS=Mus musculus GN=Abhd14b PE=4 SV=1        | 0.300088 | 0.0005866 | 0.1490124 |
| Mthfsl   | Protein Mthfsl OS=Mus musculus GN=Mthfsl PE=4<br>SV=1                                             | 0.298987 | 0.0022019 | 0.1490124 |
| Polr1c   | DNA-directed RNA polymerases I and III subunit<br>RPAC1 OS=Mus musculus GN=Polr1c PE=1 SV=3       | 0.296349 | 0.0069466 | 0.1730496 |
| Dhx40    | Probable ATP-dependent RNA helicase DHX40<br>OS=Mus musculus GN=Dhx40 PE=2 SV=1                   | 0.295348 | 0.0023589 | 0.1490124 |
| Apob     | Apolipoprotein B-100 OS=Mus musculus GN=Apob<br>PE=1 SV=1                                         | 0.293909 | 0.0024380 | 0.1490124 |
| Myh8     | Myosin-8 OS=Mus musculus GN=Myh8 PE=2 SV=2                                                        | 0.293012 | 0.0069421 | 0.1730496 |
| Htra1    | Serine protease HTRA1 OS=Mus musculus<br>GN=Htra1 PE=1 SV=2                                       | 0.290679 | 0.0023375 | 0.1490124 |
| Armxc5   | Armadillo repeat-containing X-linked protein 5<br>OS=Mus musculus GN=Armxc5 PE=2 SV=1             | 0.289736 | 0.0074542 | 0.1752156 |
| Ptgr1    | Prostaglandin reductase 1 OS=Mus musculus<br>GN=Ptgr1 PE=1 SV=2                                   | 0.288914 | 0.0006880 | 0.1490124 |
| Atp5k    | ATP synthase subunit e, mitochondrial OS=Mus<br>musculus GN=Atp5i PE=1 SV=2                       | 0.288093 | 0.0011927 | 0.1490124 |
| Zkscan16 | Protein Zkscan16 OS=Mus musculus GN=Zkscan16<br>PE=4 SV=1                                         | 0.287461 | 0.0024523 | 0.1490124 |
| Lmod1    | Leiomodin-1 OS=Mus musculus GN=Lmod1 PE=2<br>SV=1                                                 | 0.286231 | 0.0108474 | 0.1942192 |

|         |                                                                                          |          |           |           |
|---------|------------------------------------------------------------------------------------------|----------|-----------|-----------|
| Krt78   | Protein Krt78 OS=Mus musculus GN=Krt78 PE=4 SV=1                                         | 0.284099 | 0.0010425 | 0.1490124 |
| Riok3   | Serine/threonine-protein kinase RIO3 OS=Mus musculus GN=Riok3 PE=1 SV=3                  | 0.283074 | 0.0038537 | 0.1667068 |
| Stard7  | StAR-related lipid transfer protein 7, mitochondrial OS=Mus musculus GN=Stard7 PE=2 SV=2 | 0.282627 | 0.0011996 | 0.1490124 |
| Gan     | Gigaxonin OS=Mus musculus GN=Gan PE=1 SV=2                                               | 0.282588 | 0.005966  | 0.1716923 |
| Akr1b10 | MCG142264, isoform CRA_b OS=Mus musculus GN=Akr1b10 PE=4 SV=1                            | 0.282115 | 0.0068845 | 0.1730496 |
| L3hypdh | Trans-L-3-hydroxyproline dehydratase OS=Mus musculus GN=L3hypdh PE=1 SV=1                | 0.281569 | 0.0105701 | 0.1940681 |
| Psme2   | Proteasome activator complex subunit 2 OS=Mus musculus GN=Psme2 PE=2 SV=4                | 0.280865 | 0.0005380 | 0.1490124 |
| Prkci   | Protein kinase C iota type OS=Mus musculus GN=Prkci PE=1 SV=3                            | 0.275979 | 0.0035564 | 0.1625116 |
| Park2   | E3 ubiquitin-protein ligase parkin OS=Mus musculus GN=Park2 PE=1 SV=1                    | 0.274521 | 0.0054159 | 0.1706080 |
| Rpa1    | Replication protein A 70 kDa DNA-binding subunit OS=Mus musculus GN=Rpa1 PE=1 SV=1       | 0.272969 | 0.0039620 | 0.1667068 |
| Adora2a | Adenosine receptor A2a OS=Mus musculus GN=Adora2a PE=2 SV=3                              | 0.272871 | 0.0024496 | 0.1490124 |
| Ublcp1  | Ubiquitin-like domain-containing CTD phosphatase 1 OS=Mus musculus GN=Ublcp1 PE=1 SV=1   | 0.271543 | 0.0023316 | 0.1490124 |
| Kdsr    | 3-ketodihydrosphingosine reductase OS=Mus musculus GN=Kdsr PE=2 SV=1                     | 0.271419 | 0.0057956 | 0.1716923 |
| Rnd2    | Rho-related GTP-binding protein RhoN OS=Mus musculus GN=Rnd2 PE=2 SV=1                   | 0.270936 | 0.0024288 | 0.1490124 |
| Pnck    | Calcium/calmodulin-dependent protein kinase type 1B OS=Mus musculus GN=Pnck PE=2 SV=1    | 0.270331 | 0.0077146 | 0.1765328 |
| Neil2   | Endonuclease 8-like 2 OS=Mus musculus GN=Neil2 PE=2 SV=4                                 | 0.267388 | 0.0016583 | 0.1490124 |
| Gm10639 | Glutathione S-transferase OS=Mus musculus GN=Gm10639 PE=3 SV=1                           | 0.265980 | 0.0067963 | 0.1730496 |
| Gstt1   | Glutathione S-transferase theta-1 OS=Mus musculus GN=Gstt1 PE=1 SV=4                     | 0.263453 | 0.0007519 | 0.1490124 |
| Zc3hav1 | Zinc finger CCCH-type antiviral protein 1 OS=Mus musculus GN=Zc3hav1 PE=1 SV=1           | 0.262903 | 0.0011891 | 0.1490124 |
| Nqo1    | NAD(P)H dehydrogenase [quinone] 1 OS=Mus musculus GN=Nqo1 PE=1 SV=3                      | 0.257404 | 0.0013948 | 0.1490124 |
| Phyh    | Phytanoyl-CoA dioxygenase, peroxisomal OS=Mus musculus GN=Phyh PE=1 SV=1                 | 0.256017 | 0.0072417 | 0.1751085 |
| Acvr1c  | Activin receptor type-1C OS=Mus musculus GN=Acvr1c PE=2 SV=3                             | 0.255149 | 0.0050689 | 0.1686421 |
| Mkrn1   | E3 ubiquitin-protein ligase makorin-1 OS=Mus musculus GN=Mkrn1 PE=2 SV=1                 | 0.253751 | 0.0106693 | 0.1940681 |
| Zfand1  | AN1-type zinc finger protein 1 OS=Mus musculus GN=Zfand1 PE=1 SV=1                       | 0.252494 | 0.0046455 | 0.1667068 |
| Trh     | Pro-thyrotropin-releasing hormone OS=Mus musculus GN=Trh PE=2 SV=2                       | 0.252493 | 0.0018596 | 0.1490124 |
| Lrrk1   | Leucine-rich repeat serine/threonine-protein kinase 1 OS=Mus musculus GN=Lrrk1 PE=2 SV=1 | 0.251745 | 0.0023064 | 0.1490124 |

|               |                                                                                                                    |          |           |           |
|---------------|--------------------------------------------------------------------------------------------------------------------|----------|-----------|-----------|
| Gpr161        | G-protein coupled receptor 161 OS=Mus musculus<br>GN=Gpr161 PE=1 SV=1                                              | 0.251071 | 0.0075659 | 0.1754888 |
| Hapln1        | Hyaluronan and proteoglycan link protein 1 OS=Mus<br>musculus GN=Hapln1 PE=2 SV=1                                  | 0.250771 | 0.0079060 | 0.1776188 |
| 4930534B04Rik | Centrosomal protein of 128 kDa OS=Mus musculus<br>GN=Cep128 PE=2 SV=2                                              | 0.249193 | 0.0016354 | 0.1490124 |
| Ptpn2         | Tyrosine-protein phosphatase non-receptor type 2<br>OS=Mus musculus GN=Ptpn2 PE=1 SV=2                             | 0.246751 | 0.0021214 | 0.1490124 |
| Utp14b        | U3 small nucleolar RNA-associated protein 14<br>homolog B OS=Mus musculus GN=Utp14b PE=2<br>SV=2                   | 0.246648 | 0.0060365 | 0.1716923 |
| Fam26e        | Protein FAM26E OS=Mus musculus GN=Fam26e<br>PE=2 SV=1                                                              | 0.246059 | 0.0104917 | 0.1935420 |
| Fblim1        | Filamin-binding LIM protein 1 OS=Mus musculus<br>GN=Fblim1 PE=1 SV=2                                               | 0.245381 | 0.0102875 | 0.1915043 |
| C030006K11Rik | UPF0598 protein C8orf82 homolog OS=Mus<br>musculus PE=2 SV=1                                                       | 0.244999 | 0.0024583 | 0.1490124 |
| Tagln         | Transgelin OS=Mus musculus GN=Tagln PE=1 SV=3                                                                      | 0.244752 | 0.0015623 | 0.1490124 |
| Smpd1         | Sphingomyelin phosphodiesterase OS=Mus musculus<br>GN=Smpd1 PE=2 SV=2                                              | 0.244403 | 0.0014851 | 0.1490124 |
| Lum           | Lumican OS=Mus musculus GN=Lum PE=1 SV=2                                                                           | 0.243767 | 0.0051598 | 0.1692652 |
| Pafah1b3      | Platelet-activating factor acetylhydrolase IB subunit<br>gamma OS=Mus musculus GN=Pafah1b3 PE=1<br>SV=1            | 0.243602 | 0.0010157 | 0.1490124 |
| 4921513D23Rik | Meiosis arrest female protein 1 OS=Mus musculus<br>GN=Marf1 PE=1 SV=3                                              | 0.243436 | 0.0053775 | 0.1706080 |
| Chpf2         | MCG16489, isoform CRA_a OS=Mus musculus<br>GN=Chpf2 PE=2 SV=1                                                      | 0.242758 | 0.0046836 | 0.1667068 |
| Mylk3         | Myosin light chain kinase 3 OS=Mus musculus<br>GN=Mylk3 PE=1 SV=1                                                  | 0.242616 | 0.0019054 | 0.1490124 |
| Fbxl21        | F-box/LRR-repeat protein 21 OS=Mus musculus<br>GN=Fbxl21 PE=1 SV=1                                                 | 0.242168 | 0.0099101 | 0.1897440 |
| Coq3          | Hexaprenyldihydroxybenzoate methyltransferase,<br>mitochondrial OS=Mus musculus GN=Coq3 PE=1<br>SV=1               | 0.241935 | 0.0017174 | 0.1490124 |
| Bdh2          | 3-hydroxybutyrate dehydrogenase type 2 OS=Mus<br>musculus GN=Bdh2 PE=1 SV=1                                        | 0.241390 | 0.0054735 | 0.1706080 |
| Sp3           | Transcription factor Sp3 OS=Mus musculus GN=Sp3<br>PE=1 SV=2                                                       | 0.240977 | 0.0008579 | 0.1490124 |
| D3Ert751e     | UPF0462 protein C4orf33 homolog OS=Mus<br>musculus GN=D3Ert751e PE=2 SV=1                                          | 0.239014 | 0.0009103 | 0.1490124 |
| Mmp14         | Matrix metalloproteinase-14 OS=Mus musculus<br>GN=Mmp14 PE=2 SV=3                                                  | 0.237982 | 0.0011280 | 0.1490124 |
| Kcnab3        | Potassium voltage-gated channel, shaker-related<br>subfamily, beta member 3 OS=Mus musculus<br>GN=Kcnab3 PE=2 SV=1 | 0.237316 | 0.0009507 | 0.1490124 |
| Kbtbd11       | Kelch repeat and BTB domain-containing protein 11<br>OS=Mus musculus GN=Kbtbd11 PE=1 SV=3                          | 0.235623 | 0.0058524 | 0.1716923 |
| Gnb4          | Guanine nucleotide-binding protein subunit beta-4<br>OS=Mus musculus GN=Gnb4 PE=2 SV=4                             | 0.235423 | 0.0023699 | 0.1490124 |
| Auh           | Methylglutaconyl-CoA hydratase, mitochondrial                                                                      | 0.234479 | 0.0008553 | 0.1490124 |

|               |                                                                                                          |          |           |             |
|---------------|----------------------------------------------------------------------------------------------------------|----------|-----------|-------------|
|               | OS=Mus musculus GN=Auh PE=1 SV=1                                                                         |          |           |             |
| Aass          | Alpha-aminoadipic semialdehyde synthase,<br>mitochondrial OS=Mus musculus GN=Aass PE=1<br>SV=1           | 0.233828 | 0.0008447 | 0.1490124   |
| Mecp2         | Methyl-CpG-binding protein 2 OS=Mus musculus<br>GN=Mecp2 PE=1 SV=1                                       | 0.233355 | 0.0069259 | 0.1730496   |
| Hapln3        | Hyaluronan and proteoglycan link protein 3 OS=Mus<br>musculus GN=Hapln3 PE=2 SV=3                        | 0.229767 | 0.0011247 | 0.1490124   |
| Trappc4       | Trafficking protein particle complex subunit 4<br>OS=Mus musculus GN=Trappc4 PE=1 SV=1                   | 0.229675 | 0.0008306 | 0.1490124   |
| Sepw1         | Selenoprotein W OS=Mus musculus GN=Sepw1<br>PE=1 SV=3                                                    | 0.227106 | 0.0013634 | 0.1490124   |
| Gnb1          | Guanine nucleotide-binding protein G(I)/G(S)/G(T)<br>subunit beta-1 OS=Mus musculus GN=Gnb1 PE=1<br>SV=3 | 0.225899 | 0.0094393 | 0.187435779 |
| Mcm6          | DNA replication licensing factor MCM6 OS=Mus<br>musculus GN=Mcm6 PE=1 SV=1                               | 0.225881 | 0.0069156 | 0.1730496   |
| Pcbd1         | Pterin-4-alpha-carbinolamine dehydratase OS=Mus<br>musculus GN=Pcbd1 PE=1 SV=2                           | 0.225393 | 0.0024432 | 0.1490124   |
| Cast          | Calpastatin OS=Mus musculus GN=Cast PE=1 SV=2                                                            | 0.225208 | 0.0033949 | 0.1592584   |
| Mgst3         | Microsomal glutathione S-transferase 3 OS=Mus<br>musculus GN=Mgst3 PE=1 SV=1                             | 0.224105 | 0.0022387 | 0.1490124   |
| Fbxo34        | F-box only protein 34 OS=Mus musculus<br>GN=Fbxo34 PE=2 SV=2                                             | -0.22517 | 0.0070348 | 0.1730496   |
| Stard5        | StAR-related lipid transfer protein 5 OS=Mus<br>musculus GN=Stard5 PE=2 SV=2                             | -0.22630 | 0.0079651 | 0.1776188   |
| Purb          | Transcriptional activator protein Pur-beta OS=Mus<br>musculus GN=Purb PE=1 SV=3                          | -0.22782 | 0.0013546 | 0.1490124   |
| Mrm1          | rRNA methyltransferase 1, mitochondrial OS=Mus<br>musculus GN=Mrm1 PE=2 SV=2                             | -0.22886 | 0.0083321 | 0.1797063   |
| Tef           | Thyrotroph embryonic factor OS=Mus musculus<br>GN=Tef PE=2 SV=1                                          | -0.23142 | 0.0018376 | 0.1490124   |
| Prom1         | Prominin-1 OS=Mus musculus GN=Prom1 PE=1<br>SV=1                                                         | -0.23269 | 0.0016913 | 0.1490124   |
| Ldb2          | LIM domain-binding protein 2 OS=Mus musculus<br>GN=Ldb2 PE=1 SV=2                                        | -0.23465 | 0.0066908 | 0.1730496   |
| Palm3         | Paralemmin-3 OS=Mus musculus GN=Palm3 PE=2<br>SV=1                                                       | -0.23623 | 0.0025284 | 0.1490124   |
| Snapin        | SNARE-associated protein Snapin OS=Mus musculus<br>GN=Snapin PE=1 SV=1                                   | -0.23669 | 0.0039376 | 0.1667068   |
| Tomm40        | Mitochondrial import receptor subunit TOM40<br>homolog OS=Mus musculus GN=Tomm40 PE=1<br>SV=3            | -0.23691 | 0.0007308 | 0.1490124   |
| Vstm2a        | V-set and transmembrane domain-containing protein<br>2A OS=Mus musculus GN=Vstm2a PE=2 SV=2              | -0.23963 | 0.0006819 | 0.1490124   |
| 1700003E16Rik | Uncharacterized protein C2orf81 homolog OS=Mus<br>musculus PE=2 SV=3                                     | -0.23968 | 0.0008446 | 0.1490124   |
| Myl4          | Myosin light chain 4 OS=Mus musculus GN=Myl4<br>PE=2 SV=1                                                | -0.23997 | 0.0091446 | 0.1842018   |
| Lsm2          | U6 snRNA-associated Sm-like protein LSm2<br>OS=Mus musculus GN=Lsm2 PE=3 SV=1                            | -0.24021 | 0.0036555 | 0.1648874   |

|               |                                                                                                     |          |           |           |
|---------------|-----------------------------------------------------------------------------------------------------|----------|-----------|-----------|
| Nasp          | Nuclear autoantigenic sperm protein OS=Mus musculus GN=Nasp PE=1 SV=2                               | -0.24421 | 0.0009576 | 0.1490124 |
| Axin1         | Axin-1 OS=Mus musculus GN=Axin1 PE=1 SV=3                                                           | -0.24539 | 0.0015356 | 0.1490124 |
| Armc2         | Armado repeat-containing protein 2 (Fragment) OS=Mus musculus GN=Armc2 PE=4 SV=1                    | -0.24750 | 0.0039861 | 0.1667068 |
| Ctdspl        | CTD small phosphatase-like protein OS=Mus musculus GN=Ctdspl PE=2 SV=3                              | -0.25009 | 0.0018107 | 0.1490124 |
| Otub2         | Ubiquitin thioesterase OTUB2 OS=Mus musculus GN=Otub2 PE=2 SV=1                                     | -0.25112 | 0.0094853 | 0.1877460 |
| Gng4          | Guanine nucleotide-binding protein G(I)/G(S)/G(O) subunit gamma-4 OS=Mus musculus GN=Gng4 PE=2 SV=1 | -0.25691 | 0.0071424 | 0.1742233 |
| Ero1lb        | ERO1-like protein beta OS=Mus musculus GN=Ero1lb PE=1 SV=1                                          | -0.25870 | 0.0054418 | 0.1706080 |
| Txndc11       | Thioredoxin domain-containing protein 11 OS=Mus musculus GN=Txndc11 PE=2 SV=1                       | -0.26196 | 0.0016121 | 0.1490124 |
| Ctnnbip1      | Beta-catenin-interacting protein 1 OS=Mus musculus GN=Ctnnbip1 PE=1 SV=1                            | -0.26339 | 0.0063937 | 0.1729044 |
| Usp43         | Ubiquitin carboxyl-terminal hydrolase 43 OS=Mus musculus GN=Usp43 PE=2 SV=2                         | -0.26427 | 0.0009980 | 0.1490124 |
| Coa7          | Cytochrome c oxidase assembly factor 7 OS=Mus musculus GN=Coa7 PE=2 SV=1                            | -0.26844 | 0.0004200 | 0.1490124 |
| Lrrc3         | Leucine-rich repeat-containing protein 3 OS=Mus musculus GN=Lrrc3 PE=2 SV=1                         | -0.27502 | 0.0015096 | 0.1490124 |
| Rgl2          | Ral guanine nucleotide dissociation stimulator-like 2 OS=Mus musculus GN=Rgl2 PE=1 SV=2             | -0.27713 | 0.0058820 | 0.1716923 |
| Dpysl3        | Dihydropyrimidinase-related protein 3 OS=Mus musculus GN=Dpysl3 PE=1 SV=1                           | -0.27781 | 0.0004660 | 0.1490124 |
| Rras2         | Ras-related protein R-Ras2 OS=Mus musculus GN=Rras2 PE=1 SV=1                                       | -0.27922 | 0.0007024 | 0.1490124 |
| Igsf1         | Immunoglobulin superfamily member 1 OS=Mus musculus GN=Igsf1 PE=2 SV=1                              | -0.28423 | 0.0047450 | 0.1667068 |
| Igf2bp3       | Insulin-like growth factor 2 mRNA-binding protein 3 OS=Mus musculus GN=Igf2bp3 PE=1 SV=1            | -0.29149 | 0.0023039 | 0.1490124 |
| Sdhc          | Succinate dehydrogenase cytochrome b560 subunit, mitochondrial OS=Mus musculus GN=Sdhc PE=2 SV=1    | -0.29649 | 0.0022849 | 0.1490124 |
| Fam96a        | MIP18 family protein FAM96A OS=Mus musculus GN=Fam96a PE=2 SV=1                                     | -0.29655 | 0.0035273 | 0.1622242 |
| Abt1          | Activator of basal transcription 1 OS=Mus musculus GN=Abt1 PE=2 SV=1                                | -0.29735 | 0.0018147 | 0.1490124 |
| Rpl13a        | 60S ribosomal protein L13a OS=Mus musculus GN=Rpl13a PE=1 SV=4                                      | -0.29776 | 0.0022999 | 0.1490124 |
| Gpc6          | Glypican-6 OS=Mus musculus GN=Gpc6 PE=1 SV=1                                                        | -0.30215 | 0.0028191 | 0.1503917 |
| Klhl41        | Kelch-like protein 41 OS=Mus musculus GN=Klhl41 PE=1 SV=1                                           | -0.30319 | 0.0039214 | 0.1667068 |
| 5033414D02Rik | Plasminogen receptor (KT) OS=Mus musculus GN=Plgrkt PE=1 SV=1                                       | -0.30785 | 0.0003081 | 0.1445616 |
| Ppic          | Peptidyl-prolyl cis-trans isomerase C OS=Mus musculus GN=Ppic PE=1 SV=1                             | -0.30903 | 0.0064175 | 0.1729044 |
| Dhcr24        | Delta(24)-sterol reductase OS=Mus musculus                                                          | -0.31283 | 0.0027802 | 0.1499118 |

|               |                                                                                                  |          |           |           |
|---------------|--------------------------------------------------------------------------------------------------|----------|-----------|-----------|
|               | GN=Dhcr24 PE=2 SV=1                                                                              |          |           |           |
| Nup35         | Nucleoporin NUP53 OS=Mus musculus GN=Nup35<br>PE=1 SV=2                                          | -0.31546 | 0.0023966 | 0.1490124 |
| Aldh1l2       | Mitochondrial 10-formyltetrahydrofolate<br>dehydrogenase OS=Mus musculus GN=Aldh1l2<br>PE=1 SV=2 | -0.31758 | 0.0003261 | 0.1457150 |
| Tmem119       | Transmembrane protein 119 OS=Mus musculus<br>GN=Tmem119 PE=2 SV=1                                | -0.32296 | 0.0031857 | 0.1550187 |
| Purg          | Purine-rich element-binding protein gamma OS=Mus<br>musculus GN=Purg PE=2 SV=1                   | -0.32465 | 0.0058998 | 0.1716923 |
| Dzip1l        | Zinc finger protein DZIP1L OS=Mus musculus<br>GN=Dzip1l PE=2 SV=1                                | -0.32583 | 0.0003477 | 0.1483087 |
| Dpysl5        | Dihydropyrimidinase-related protein 5 OS=Mus<br>musculus GN=Dpysl5 PE=1 SV=1                     | -0.32720 | 0.0002656 | 0.1417217 |
| Zfp275        | Protein Zfp275 OS=Mus musculus GN=Zfp275 PE=4<br>SV=1                                            | -0.32774 | 0.0012549 | 0.1490124 |
| Fam108a       | Alpha/beta hydrolase domain-containing protein 17A<br>OS=Mus musculus GN=Abhd17a PE=2 SV=1       | -0.33300 | 0.0011224 | 0.1490124 |
| Hmga2         | High mobility group protein HMGI-C OS=Mus<br>musculus GN=Hmga2 PE=1 SV=1                         | -0.33384 | 0.0032860 | 0.1559096 |
| Matn4         | Matrilin-4 OS=Mus musculus GN=Matn4 PE=2<br>SV=1                                                 | -0.33558 | 0.0003698 | 0.1490124 |
| Ugt8a         | 2-hydroxyacylsphingosine 1-beta-<br>galactosyltransferase OS=Mus musculus GN=Ugt8<br>PE=2 SV=2   | -0.33577 | 0.0026247 | 0.1490124 |
| B4galt7       | Beta-1,4-galactosyltransferase 7 OS=Mus musculus<br>GN=B4galt7 PE=2 SV=1                         | -0.34022 | 0.0001845 | 0.1417217 |
| Celsr3        | Cadherin EGF LAG seven-pass G-type receptor 3<br>OS=Mus musculus GN=Celsr3 PE=2 SV=2             | -0.34061 | 0.0062547 | 0.1729044 |
| BC003965      | Protein CCSMST1 OS=Mus musculus GN=Ccsmst1<br>PE=3 SV=1                                          | -0.34295 | 0.0083777 | 0.1798626 |
| Tnc           | Tenascin OS=Mus musculus GN=Tnc PE=1 SV=1                                                        | -0.34792 | 0.0018081 | 0.1490124 |
| Chst3         | Carbohydrate sulfotransferase 3 OS=Mus musculus<br>GN=Chst3 PE=2 SV=1                            | -0.34873 | 0.0001378 | 0.1417217 |
| Cxadr         | Coxsackievirus and adenovirus receptor homolog<br>OS=Mus musculus GN=Cxadr PE=1 SV=1             | -0.35377 | 0.0100733 | 0.1901563 |
| Dynlt1c       | Dynein light chain Tctex-type 1 OS=Mus musculus<br>GN=Dynlt1 PE=1 SV=1                           | -0.36184 | 0.0025588 | 0.1490124 |
| Tmem208       | Transmembrane protein 208 OS=Mus musculus<br>GN=Tmem208 PE=2 SV=1                                | -0.36223 | 0.0009486 | 0.1490124 |
| 4632428N05Rik | Protein 4632428N05Rik OS=Mus musculus<br>GN=4632428N05Rik PE=4 SV=1                              | -0.36465 | 0.0091326 | 0.1842018 |
| Fam109a       | Sesquipedalian-1 OS=Mus musculus GN=Fam109a<br>PE=2 SV=1                                         | -0.36881 | 0.0014790 | 0.1490124 |
| Dnmt3a        | DNA (cytosine-5)-methyltransferase 3A OS=Mus<br>musculus GN=Dnmt3a PE=1 SV=2                     | -0.36916 | 0.0001369 | 0.1417217 |
| Dirc2         | Disrupted in renal carcinoma protein 2 homolog<br>OS=Mus musculus GN=Dirc2 PE=2 SV=1             | -0.37521 | 0.0009443 | 0.1490124 |
| Gjd2          | Gap junction delta-2 protein OS=Mus musculus<br>GN=Gjd2 PE=2 SV=2                                | -0.38269 | 0.0084947 | 0.1807205 |
| Ank           | Progressive ankylosis protein OS=Mus musculus                                                    | -0.38600 | 0.0002172 | 0.1417217 |

|           |                                                                                                    |          |           |            |
|-----------|----------------------------------------------------------------------------------------------------|----------|-----------|------------|
|           | GN=Ankh PE=2 SV=1                                                                                  |          |           |            |
| Fa2h      | Fatty acid 2-hydroxylase OS=Mus musculus<br>GN=Fa2h PE=1 SV=1                                      | -0.38712 | 0.0010519 | 0.1490124  |
| D1Ert622e | UNC119-binding protein C5orf30 homolog OS=Mus<br>musculus GN=D1Ert622e PE=2 SV=1                   | -0.39393 | 0.0002840 | 0.14172171 |
| Ptrhd1    | Putative peptidyl-tRNA hydrolase PTRHD1 OS=Mus<br>musculus GN=Ptrhd1 PE=3 SV=1                     | -0.39453 | 0.0014717 | 0.1490124  |
| Plekhh1   | Pleckstrin homology domain-containing family H<br>member 1 OS=Mus musculus GN=Plekhh1 PE=2<br>SV=2 | -0.40122 | 0.0088566 | 0.1835521  |
| Elov1     | Elongation of very long chain fatty acids protein 1<br>OS=Mus musculus GN=Elov1 PE=2 SV=1          | -0.40976 | 0.0005489 | 0.1490124  |
| Atp6v0c   | V-type proton ATPase 16 kDa proteolipid subunit<br>OS=Mus musculus GN=Atp6v0c PE=2 SV=1            | -0.42179 | 0.0025008 | 0.1490124  |
| Fabp7     | Fatty acid-binding protein, brain OS=Mus musculus<br>GN=Fabp7 PE=1 SV=2                            | -0.51224 | 8.54E-05  | 0.1417217  |
| Marcksl1  | MARCKS-related protein OS=Mus musculus<br>GN=Marcksl1 PE=1 SV=2                                    | -0.58951 | 0.0002589 | 0.1417217  |
