# Supplementary figures and images for: Mutant LRRK2 mediates peripheral and central immune responses leading to neurodegeneration in vivo
Source: Oxford University Press journal article supplement (doi:10.1093/brain/awy077), 2018-03-04

A

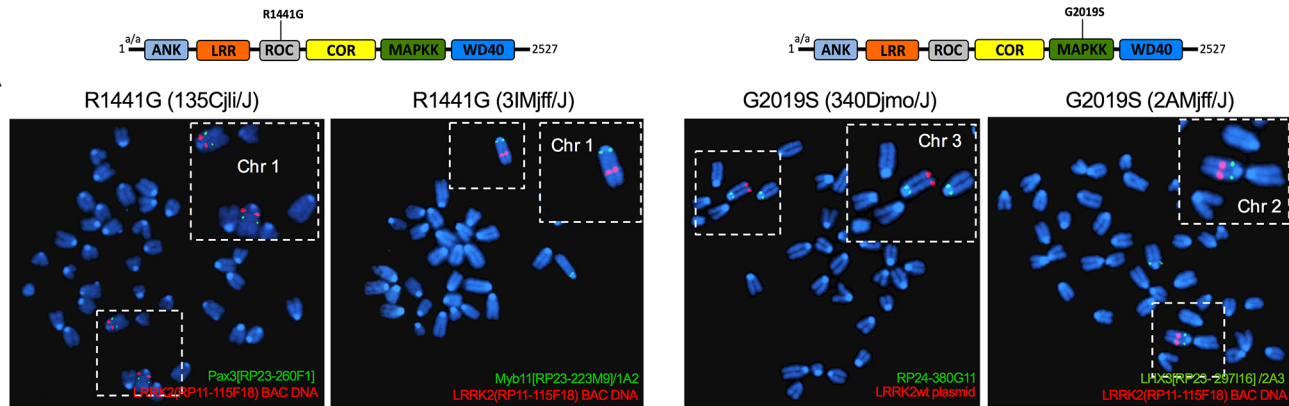

B

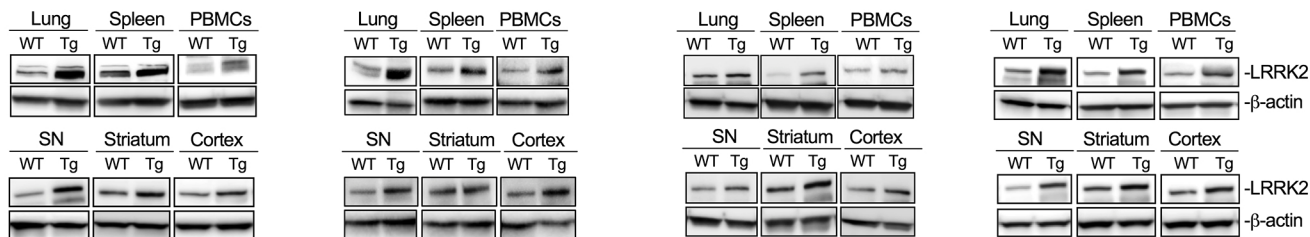

C

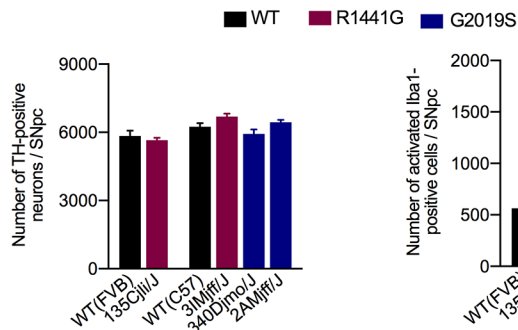

D

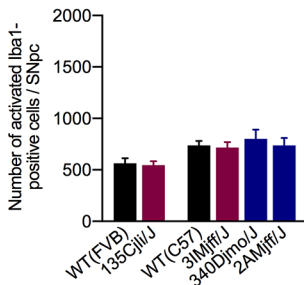

E

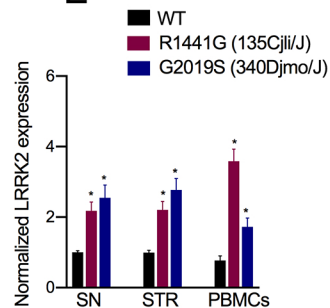

Supplement: awy077_suppl_data.zip [file awy077_suppl_data.zip › brain-2017-01999-File009.pdf]

**A**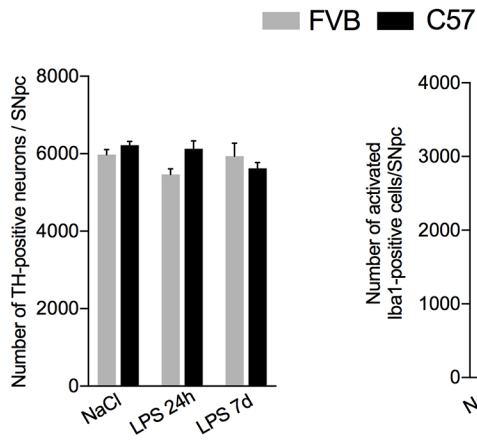**B**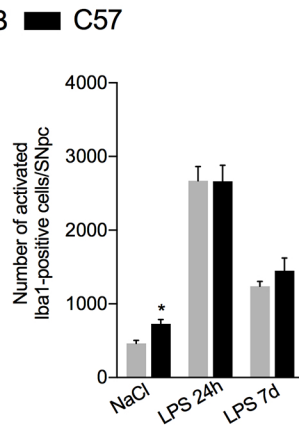**C**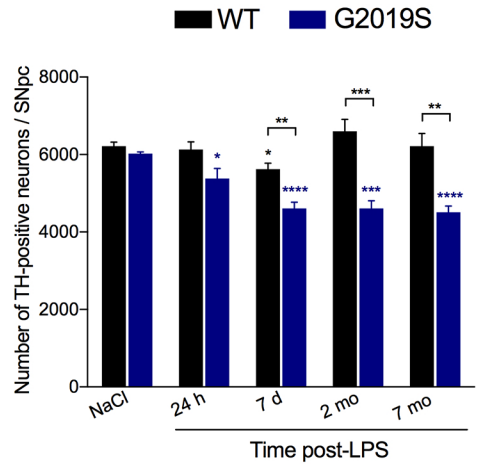**D**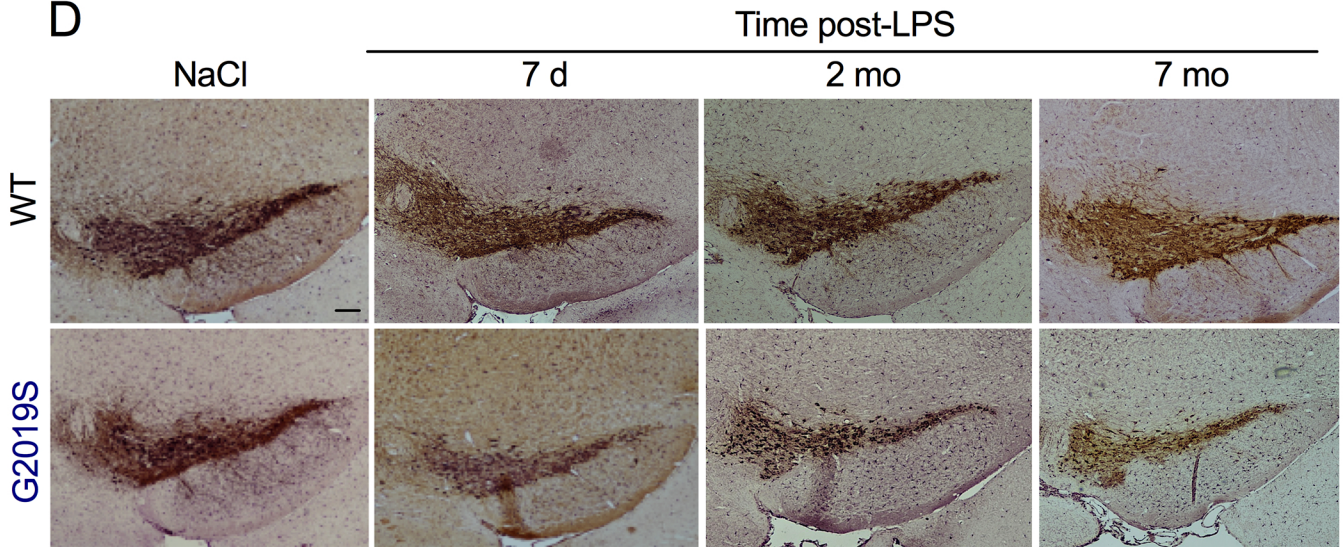**E**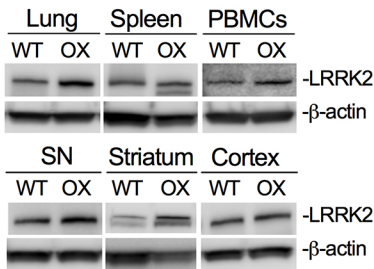**F**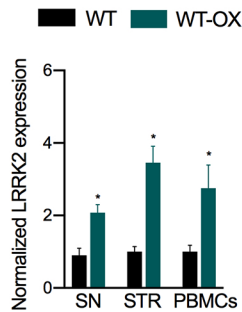**G**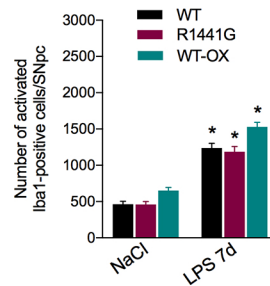**H**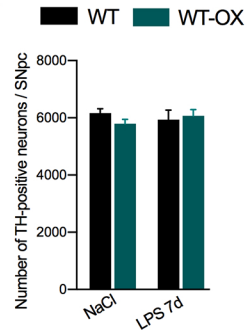

Supplement: awy077_suppl_data.zip [file awy077_suppl_data.zip › brain-2017-01999-File010.pdf]

Time post-LPS

A

NaCl

24 h

7 d

2 mo

7 mo

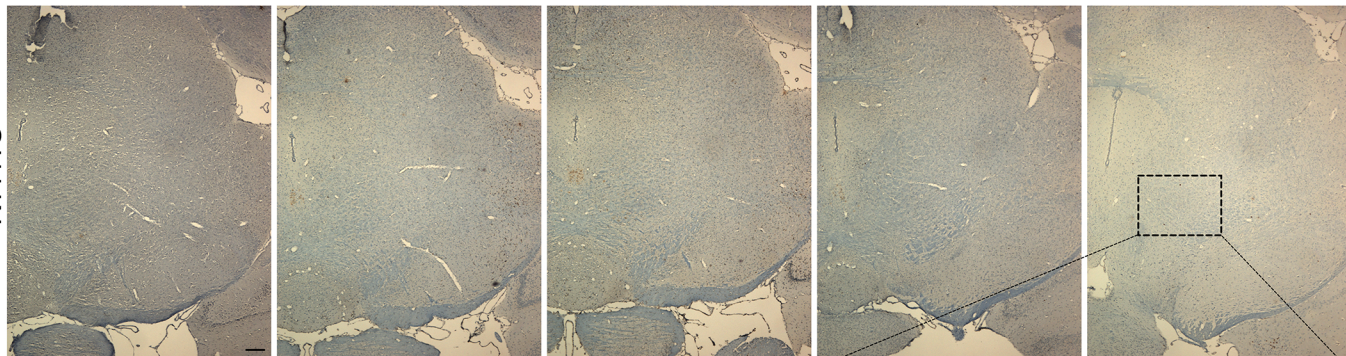

B

NaCl

LPS

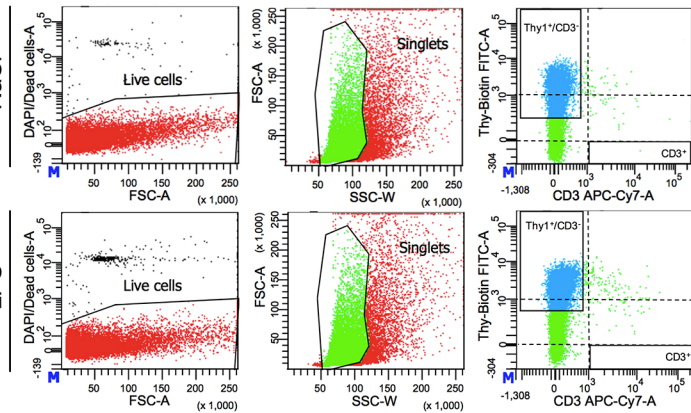

A'

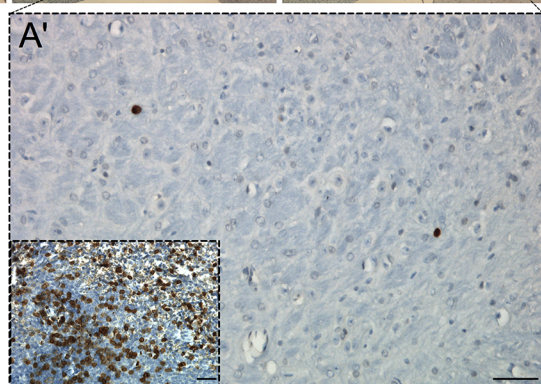

Supplement: awy077_suppl_data.zip [file awy077_suppl_data.zip › brain-2017-01999-File011.pdf]

**A**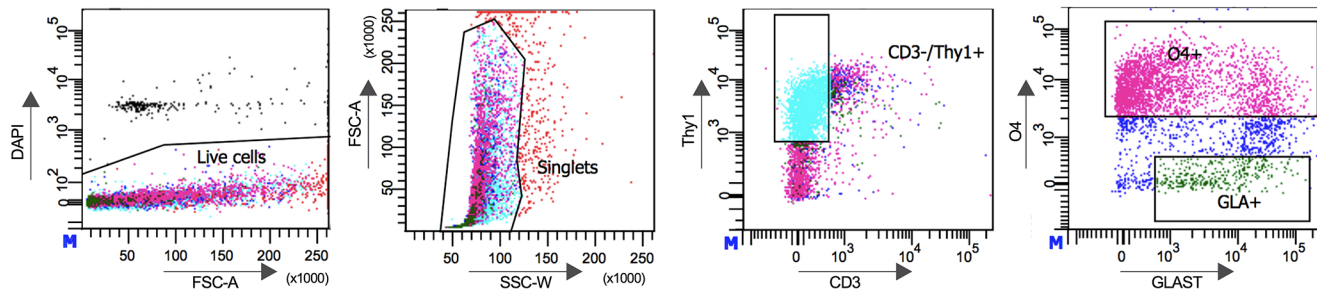**B**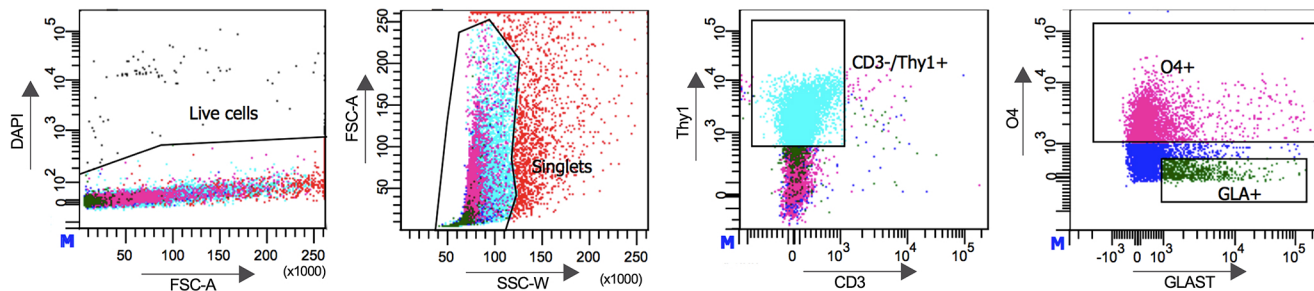**C**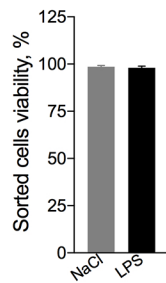**D**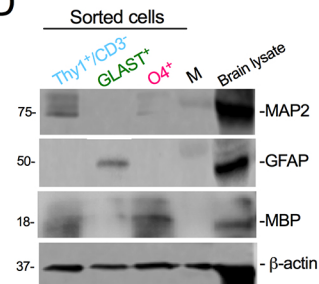

Supplement: awy077_suppl_data.zip [file awy077_suppl_data.zip › brain-2017-01999-File012.pdf]

A

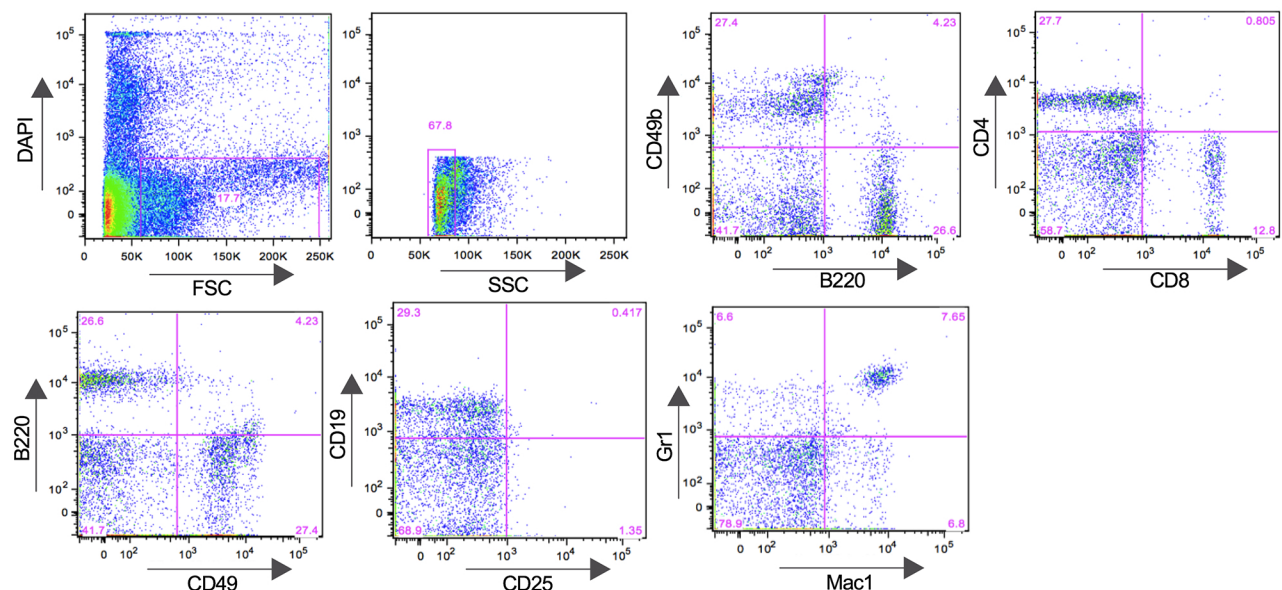

B

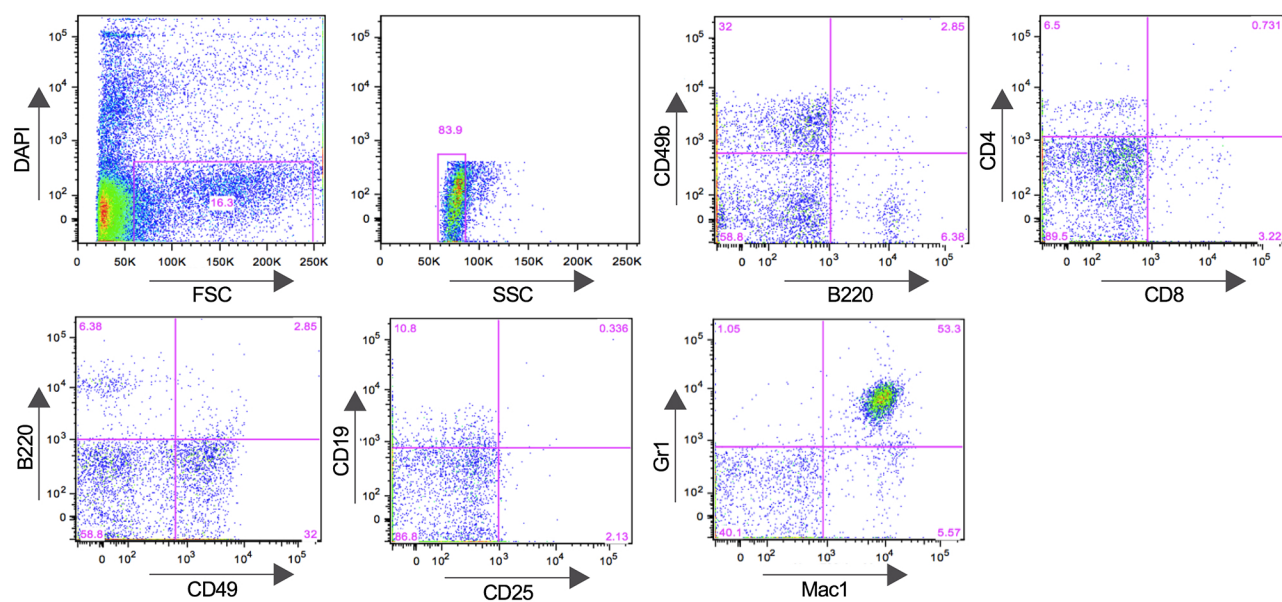

C

■ WT ■ R1441G

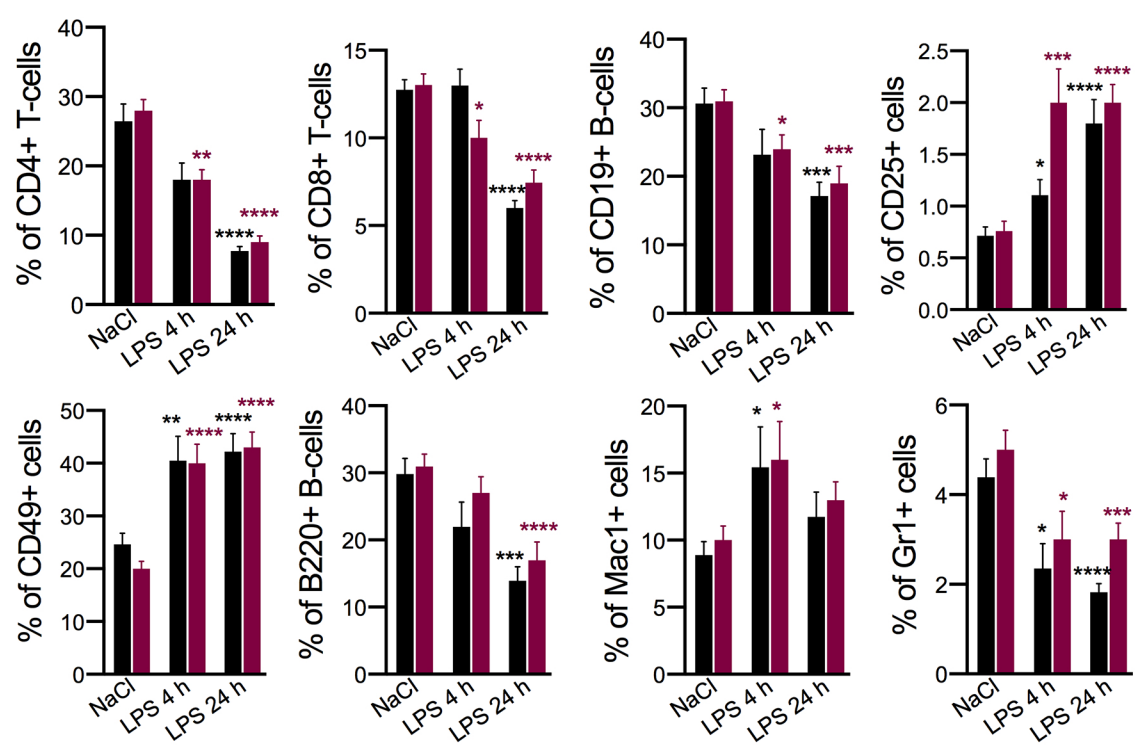

Supplement: awy077_suppl_data.zip [file awy077_suppl_data.zip › brain-2017-01999-File013.pdf]
